# Supplementary material
Source: publisher figshare collection journal article supplement (https://asha.figshare.com/ndownloader/files/38829831)
Supplement: Supplementary file 1 [file 38829831]

## **Supplemental Material S1. Deviations from preregistration.**

We provide justifications for any deviations from the preregistration protocols below. The "Experiment 1" heading includes aspects of the Experiment 1 write-up that were not specified in the Experiment 1 preregistration. The "Experiments 1 & 2" heading includes aspects of the write-up for Experiment 1 and 2 that were not specified in either the Experiment 1 or the Experiment 2 preregistration protocol. To our knowledge, there were no other deviations from the Experiment 2 preregistration.

### Experiment 1

- Due to the unexpectedly high attrition rate (i.e., participants failing to meet one of the screening checks), we recruited an additional 21 participants to ensure that we met our target sample size.
- To reduce the impact of sustained inattention or a lack of engagement affecting auditory attention ability scores, we excluded data from participants who scored below chance (< 50% correct) on the dichotic listening task. This resulted in the removal of data from an additional two participants in Experiment 1.

### Experiments 1 & 2

- We included an additional attention check at the end of HSPS questionnaire ( "*Please mark number 7 ('Extremely') for this question?*" ) to help identify and remove potentially problematic participant responses. This resulted in the withdrawal of data from three participants in total across Experiments 1 and 2.
